# Supplementary material for: RSEM: accurate transcript quantification from RNA-Seq data with or without a reference genome
Source: Springer Nature journal article supplement (doi:10.1186/1471-2105-12-323), 2011-08-04

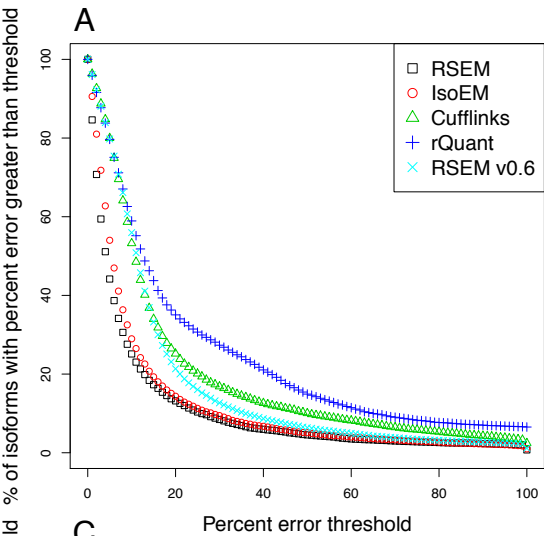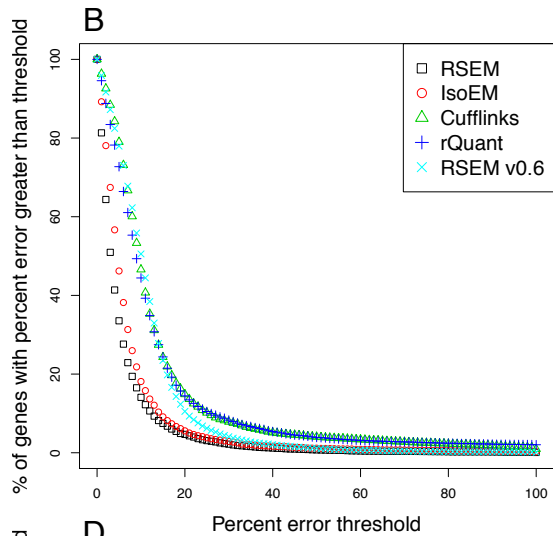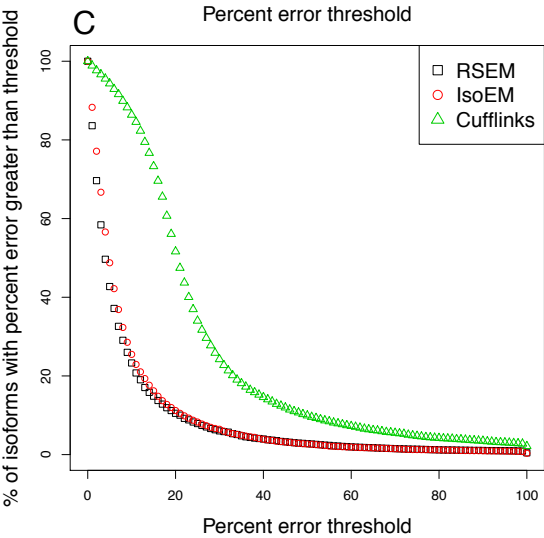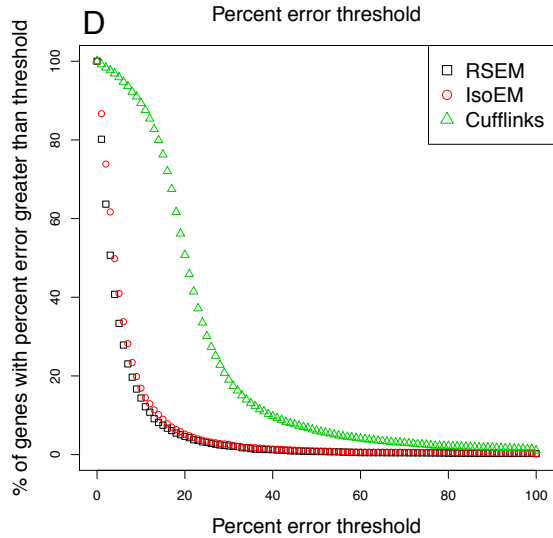

Supplement: 12859_2011_4733_MOESM10_ESM.pdf [file 12859_2011_4733_MOESM10_ESM.pdf]
